# Supplementary material for: Donor glucose-6-phosphate dehydrogenase deficiency decreases blood quality for transfusion
Source: JCI journal article supplement (doi:10.1172/jci133530), 2020-01-21
Supplement: sd1 [file 1]

**Supplementary Figure 1. G6PD enzyme activity in fresh RBCs of study participants.** A histogram of 27 G6PD-normal and 10 G6PD-deficient subjects is shown. One G6PD-deficient subject had the Mediterranean variant and 9 had the A-variant, as labeled.

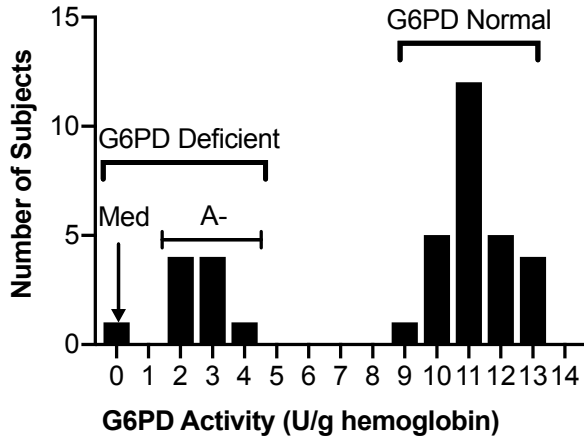

**Supplementary Figure 2. G6PD-deficient RBCs undergo similar metabolic changes as G6PD-normal RBCs with some specific differences.** G6PD-deficient RBCs are also characterized by specific changes in arginine and flavin metabolism, the PPP, carboxylates, carnitines, and oxylipins. A vectorial (scalable) version of this figure, including metabolite names, is provided in **Supplementary Figures 3 and 4** for RBCs and supernatants, respectively.

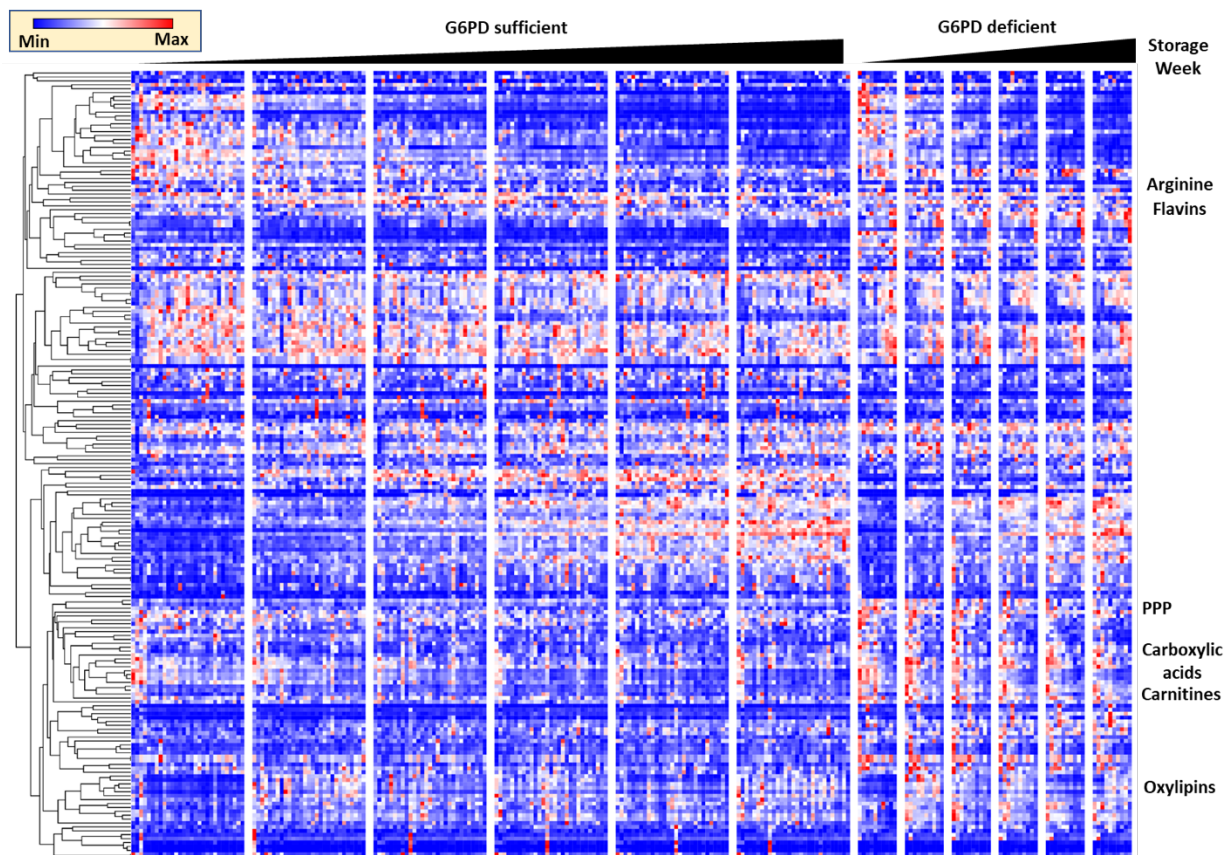

**Supplementary Figure 3. G6PD-deficient RBCs undergo similar metabolic changes as G6PD-normal RBCs with some specific differences (RBCs).** A vectorial (scalable) version of **Supplementary Figure 2** for RBCs.

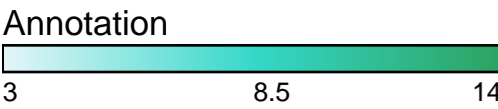

- week1+
- week1-
- week2+
- week2-
- week3+
- week3-
- week4+
- week4-
- week5+
- week5-
- week6+
- week6-

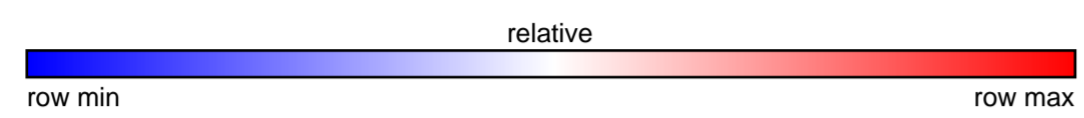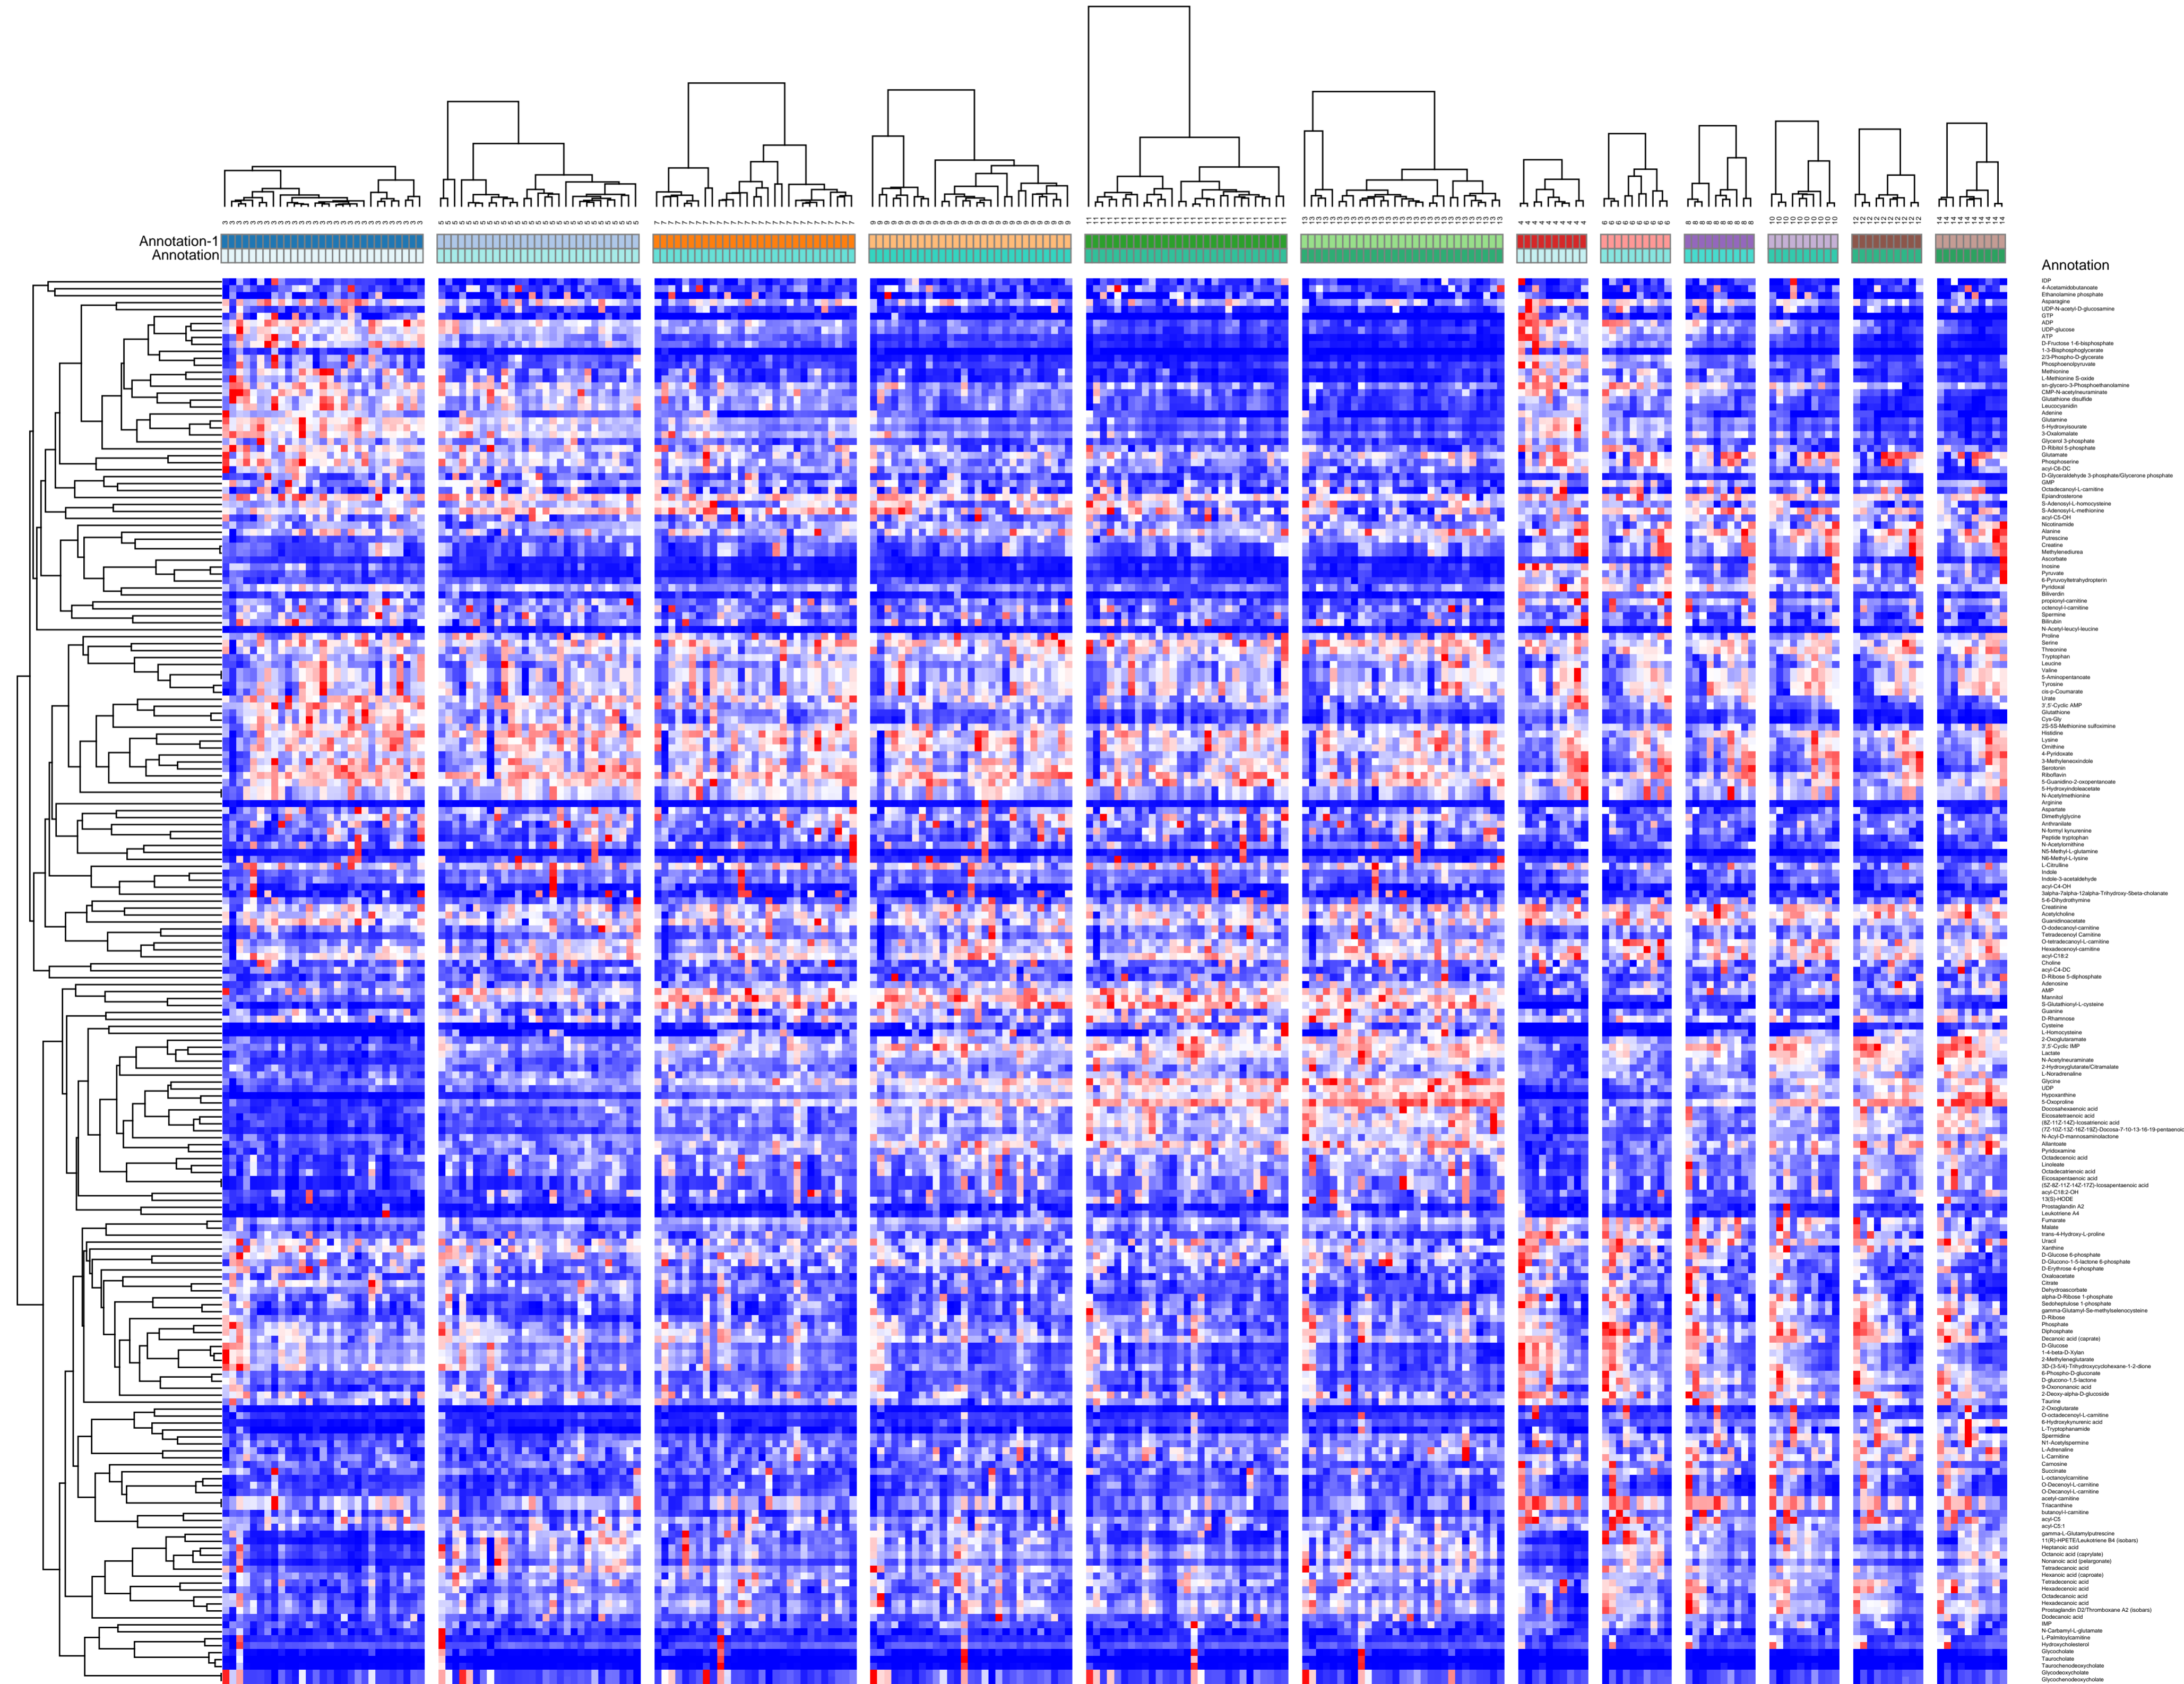

**Supplementary Figure 4. G6PD-deficient RBCs undergo similar metabolic changes as G6PD-normal RBCs with some specific differences (supernatant). A vectorial (scalable) version of **Supplementary Figure 2** for supernatants.**

- Annotation-1
- 01-pre+
  - 02-pre-
  - 03-week1+
  - 04-week1-
  - 05-week2+
  - 06-week2-
  - 07-week3+
  - 08-week3-
  - 09-week4+
  - 10-week4-
  - 11-week5+
  - 12-week5-
  - 13-week6+
  - 14-week6-

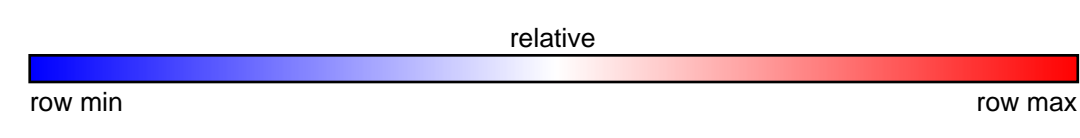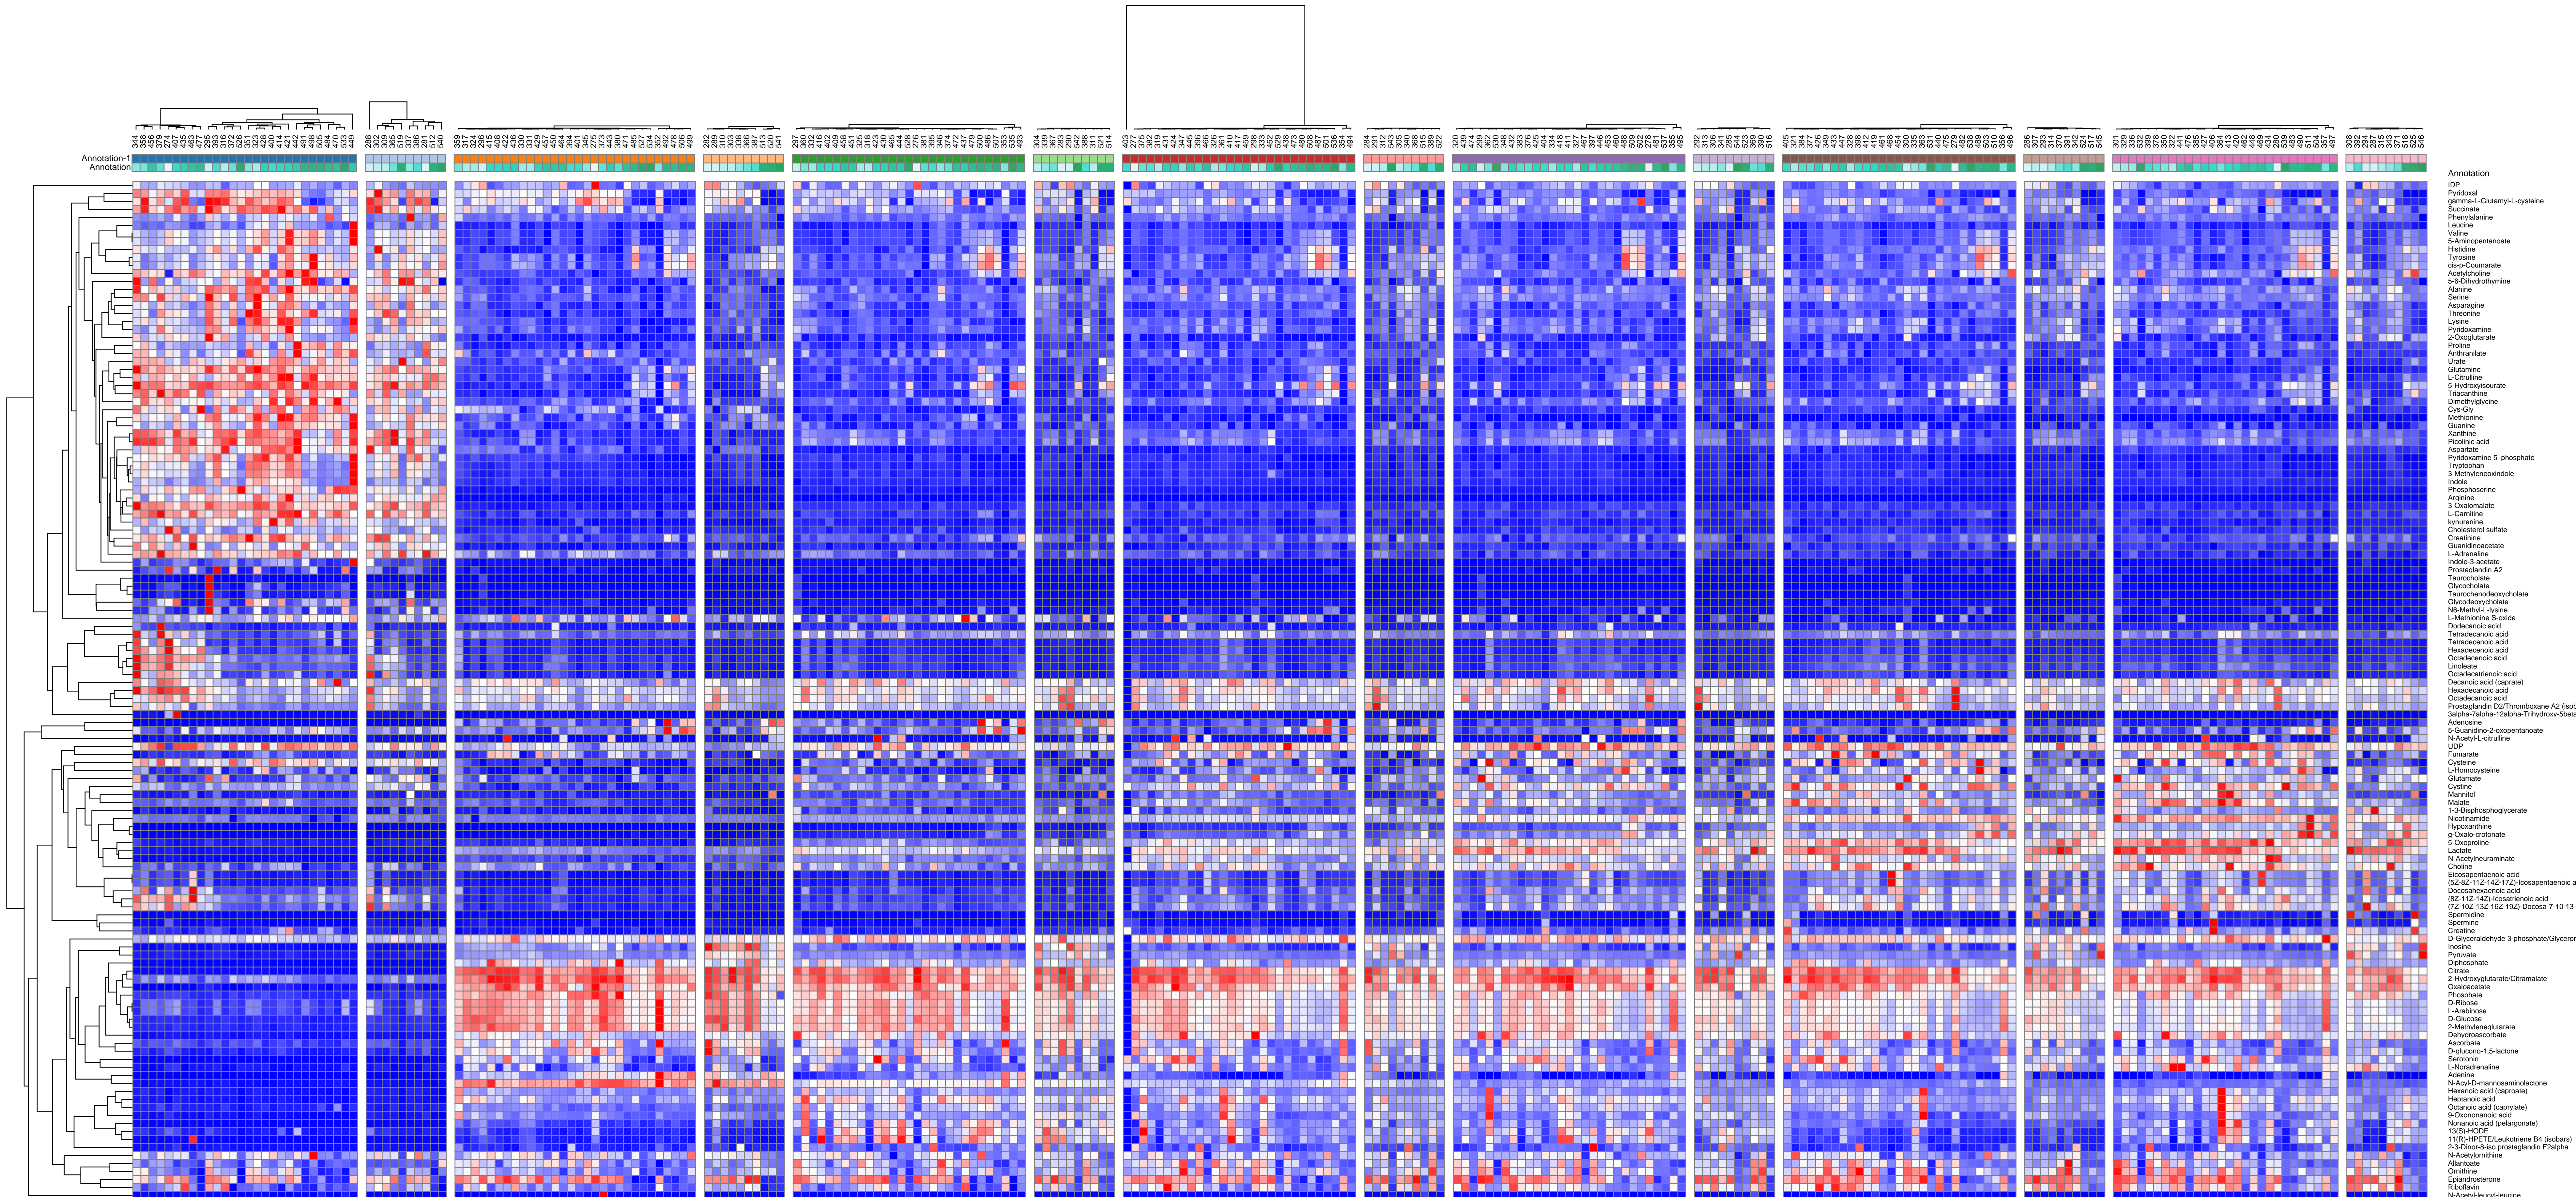

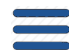

Trial record 1 of 1 for: NCT04081272

Previous Study | [Return to List](#) | Next Study

## Effect of G6PD Deficiency on Red Blood Cell Storage

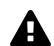

The safety and scientific validity of this study is the responsibility of the study sponsor and investigators. Listing a study does not mean it has been evaluated by the U.S. Federal Government. Read our [disclaimer](#) for details.

ClinicalTrials.gov Identifier: NCT04081272

[Recruitment Status](#) ⓘ : Completed[First Posted](#) ⓘ : September 9, 2019[Last Update Posted](#) ⓘ : September 17, 2019**Sponsor:**

Columbia University

**Collaborator:**

New York Blood Center

**Information provided by (Responsible Party):**

Columbia University

[Study Details](#)[Tabular View](#)[No Results Posted](#)[Disclaimer](#)[How to Read a Study Record](#)

### Study Description

Go to

**Brief Summary:**

The proposed study will determine whether G6PD-deficient RBCs store differently than normal RBCs under standard blood banking conditions. The investigators plan to screen a large number of healthy male volunteers for G6PD deficiency in order to identify 10 G6PD deficient and 30 matched normal individuals using a blood sample obtained from a finger-stick. The identified individuals will then be asked to donate a unit of blood that will be stored for up to 42

days and various tests will be performed on these units during storage. At 6 weeks of storage a portion of the unit will be radioactively labeled and re-infused into the volunteer. Blood samples will be drawn before, during, and after the infusion to measure how well or poorly the red blood cells survive after transfusion.

| <a href="#">Condition or disease</a> ⓘ | <a href="#">Intervention/treatment</a> ⓘ |
|----------------------------------------|------------------------------------------|
| G6PD Deficiency                        | Drug: Sodium Chromate Cr51               |

#### Detailed Description:

Glucose-6-phosphate dehydrogenase (G6PD) deficiency is the most common enzyme deficiency, affecting approximately 400 million people world-wide. It manifests as red blood cell (RBC) destruction in response to oxidative stress, which can be precipitated by infection, and by the ingestion of certain medications and foods. The prevalence of G6PD deficiency varies among populations and is most commonly found in individuals from sub-Saharan Africa, the Mediterranean region, and south-east Asia. Although in most studies G6PD-deficient individuals have normal RBC survival at steady-state, this may vary based upon the G6PD variant present, and some individuals may have shortened RBC survival. While it is not routine practice to screen blood donors for G6PD deficiency, G6PD deficient donor RBCs may store more poorly than normal RBCs. In addition, the transfusion of stored G6PD-deficient RBCs may result in decreased RBC survival after transfusion compared to RBCs from normal donors.

## Study Design

Go to

### [Study Type](#) ⓘ :

Observational

### [Actual Enrollment](#) ⓘ :

40 participants

### **Observational Model:**

Cohort

### **Time Perspective:**

Prospective

### **Official Title:**

Effect of Glucose-6-phosphate Dehydrogenase Deficiency on Donor Red Blood Cell Storage

### [Actual Study Start Date](#) ⓘ :

November 2012

### [Actual Primary Completion Date](#) ⓘ :

August 2017

### [Actual Study Completion Date](#) ⓘ :

October 2017



**Resource links provided by the National Library of Medicine**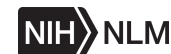

[Genetics Home Reference](#) related topics: [Glucose-6-phosphate dehydrogenase deficiency](#)

[MedlinePlus](#) related topics: [Blood Transfusion and Donation](#) [G6PD Deficiency](#)

[Drug Information](#) available for: [Sodium chromate Cr 51](#)

[Genetic and Rare Diseases Information Center](#) resources: [Glucose-6-phosphate Dehydrogenase Deficiency](#)

[U.S. FDA Resources](#)

**Groups and Cohorts**Go to 

| <a href="#">Group/Cohort</a>                                 | <a href="#">Intervention/treatment</a>                                                                                                                            |
|--------------------------------------------------------------|-------------------------------------------------------------------------------------------------------------------------------------------------------------------|
| G6PD-normal<br>Donated blood from G6PD-normal subjects       | Drug: Sodium Chromate Cr51<br>Sodium Chromate Cr 51 will be used to perform a red blood cell recovered study 24 hours post-transfusion.<br>Other Name: Chromitope |
| G6PD-deficient<br>Donated blood from G6PD-deficient subjects | Drug: Sodium Chromate Cr51<br>Sodium Chromate Cr 51 will be used to perform a red blood cell recovered study 24 hours post-transfusion.<br>Other Name: Chromitope |

**Outcome Measures**Go to **[Primary Outcome Measures](#)**  :

- 24-hour post-transfusion red blood cell recovery [ Time Frame: 24 hours ]  
Percentage of radio-labeled red blood cells remaining 24 hours after infusion

**[Secondary Outcome Measures](#)**  :

## 1. In vitro hemolysis rate [ Time Frame: 42 days ]

Percent hemolysis in the red blood cell unit in vitro

### Other Outcome Measures:

#### 1. Number of samples with metabolites detected [ Time Frame: Pre-donation to 42 days after donation ]

Metabolomics analysis: metabolites that are representative of major metabolic pathways will be measured in the red blood cells or supernatant during storage. Quantitative measurements will be performed using high performance liquid chromatography and mass spectrometry and the data obtained will be analyzed to detect correlations with the primary outcome measure of 24-hour post-transfusion red blood cell recovery.

### Biospecimen Retention: Samples With DNA

Blood will be collected to conduct a complete blood count (CBC), testing for the presence of abnormal hemoglobin types (hemoglobinopathy screen), blood type and antibody screen, and confirmation of G6PD deficiency by measuring enzyme activity. In addition, DNA will be extracted and preserved for genetic testing for G6PD deficiency.

## Eligibility Criteria

Go to

### Information from the National Library of Medicine

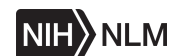

*Choosing to participate in a study is an important personal decision. Talk with your doctor and family members or friends about deciding to join a study. To learn more about this study, you or your doctor may contact the study research staff using the contacts provided below. For general information, [Learn About Clinical Studies](#).*

### Ages Eligible for Study:

18 Years to 70 Years (Adult, Older Adult)

### Sexes Eligible for Study:

Male

### Accepts Healthy Volunteers:

Yes

**Sampling Method:**

Non-Probability Sample

**Study Population**

Healthy male volunteers will be screened for G6PD deficiency in order to identify 10 G6PD deficient and 30 matched normal individuals using a blood sample obtained from a finger-stick.

**Criteria**

## Inclusion Criteria:

- Male
- Weight greater than 110 pounds
- Hemoglobin greater than 11.5 g/dL
- African (e.g., Afro-American, Afro-Caribbean, Sub-Saharan), Asian, Hispanic, Middle Eastern, or Mediterranean (e.g., Italian, Greek) based on mother's ancestry
- English speaking

## Exclusion Criteria:

- Presence of hemoglobin variant
- Ineligible for donation based on the New York Blood Center donor autologous questionnaire
- Systolic blood pressure >180 or <90 mm Hg, diastolic blood pressure >100 or <50 mm Hg
- Heart rate <50 or >100
- Temperature >99.5°F prior to donation
- Temperature >100.4°F or subjective feeling of illness prior to transfusion (this criterion is to avoid concurrent illness affecting post-transfusion measurements)
- Positive results on standard blood donor infectious disease testing

**Contacts and Locations**Go to **Information from the National Library of Medicine**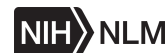

*To learn more about this study, you or your doctor may contact the study research staff using the contact information provided by the sponsor.*

*Please refer to this study by its ClinicalTrials.gov identifier (NCT number): **NCT04081272***

**Locations**

**United States, New York**

Columbia University Irving Medical Center  
New York, New York, United States, 10032

New York Blood Center  
New York, New York, United States, 10065

**Sponsors and Collaborators**

Columbia University

New York Blood Center

**Investigators**

Principal Investigator: Richard O Francis, MD, PhD Columbia University Irving Medical Center

**More Information**

Go to

---

**Responsible Party:**

Columbia University

**ClinicalTrials.gov Identifier:**

[NCT04081272](#) [History of Changes](#)

**Other Study ID Numbers:**

AAAJ6862

**First Posted:**

September 9, 2019 [Key Record Dates](#)

**Last Update Posted:**

September 17, 2019

**Last Verified:**

September 2019

**Individual Participant Data (IPD) Sharing Statement:****Plan to Share IPD:**

Yes

**Plan Description:**

We will share all individual study data results upon request once the study is published.

**Supporting Materials:**

Study Protocol

Statistical Analysis Plan (SAP)

Informed Consent Form (ICF)

Clinical Study Report (CSR)

Analytic Code

**Time Frame:**

upon request once the study is published

**Access Criteria:**

email study PI to request data

**Studies a U.S. FDA-regulated Drug Product:**

Yes

**Studies a U.S. FDA-regulated Device Product:**

No

**Product Manufactured in and Exported from the U.S.:**

No

**Keywords provided by Columbia University:**

transfusion

post-transfusion recovery

**Additional relevant MeSH terms:**

Glucosephosphate Dehydrogenase Deficiency

Anemia, Hemolytic, Congenital

Anemia, Hemolytic

Anemia

Hematologic Diseases

Genetic Diseases, Inborn

Carbohydrate Metabolism, Inborn Errors

Metabolism, Inborn Errors

Metabolic Diseases
